# Supplementary material for: A high-performance supportless silver nanowire catalyst for anion exchange membrane fuel cells
Source: Royal Society of Chemistry journal article supplement (doi:10.1039/c4ta05005c), 2014-12-02
Supplement: c4ta05005c1.pdf [file c4ta05005c1.pdf]

## Supporting Information

### High-Performance Supportless Silver Nanowire Catalyst for Anion Exchange Membrane Fuel Cells

**L. Zeng, T.S. Zhao\*, L. An**

*Department of Mechanical and Aerospace Engineering, The Hong Kong University of Science and Technology, Clear Water Bay, Kowloon, Hong Kong SAR, China.*

Corresponding author: Fax: (852) 23581543; Tel: (852) 23588647; E-

mail: [metzhao@ust.hk](mailto:metzhao@ust.hk) (T.S. Zhao)

## 1. Estimation of the porosity of anode and cathode

For the anode, the density of carbon ( $\rho_C$ ) is about  $1.80 \text{ g cm}^{-3}$ . The porous Vulcan XC-72 carbon has a total pore volume ( $V_{pore}$ ) of  $0.32 \text{ cm}^3 \text{ g}^{-1}$ . The density of porous carbon particle,  $\rho_{Cp}$  is

$$\rho_{Cp} = \frac{1}{\frac{1}{\rho_c} + V_{pore}} = \frac{1}{\frac{1}{1.80} + 0.32} = 1.14 \text{ g cm}^{-3}$$

The density of 60 wt.% Pt/C,  $\rho_{Pt(60\%)/C}$  is

$$\rho_{Pt(60\%)/C} = \frac{1}{\frac{x_{Pt}}{\rho_{Pt}} + \frac{x_{Cp}}{\rho_{Cp}}} = \frac{1}{\frac{0.6}{21.46} + \frac{0.4}{1.14}} = 2.64 \text{ g cm}^{-3}$$

In the anode, the active surface area and thickness are  $5 \text{ cm}^2$  and  $7.7 \times 10^{-4} \text{ cm}$ , respectively. Hence, the volume occupied by Pt/C,  $V_{Pt(60\%)/C}$  is

$$V_{Pt(60\%)/C} = \frac{\text{Active Area} \times \frac{\text{Pt loading}}{0.6}}{\rho_{Pt(60\%)/C}} = \frac{5 \times \frac{0.4 \times 10^{-3}}{0.6}}{2.64} = 1.26 \times 10^{-3} \text{ cm}^3$$

The density of home-made ionomer determined by experiment is  $0.94 \text{ g cm}^{-3}$ . Therefore, the volume occupied by ionomer,  $V_{ionomer}$  is

$$V_{ionomer} = \frac{\text{Active Area} \times \frac{\text{ionomer}}{\text{Pt/C}} \times \frac{\text{Pt loading}}{0.6}}{\rho_{ionomer}} = \frac{5 \times \frac{20}{80} \times \frac{0.4 \times 10^{-3}}{0.6}}{0.94} = 0.89 \times 10^{-3} \text{ cm}^3$$

The volume of the anode,  $V_{anode}$  is

$$V_{anode} = \text{Active Area} \times \text{Thickness} = 5 \times 7.7 \times 10^{-4} = 3.85 \times 10^{-3} \text{ cm}^3$$

Therefore, the porosity of **anode** is

$$\varepsilon_{anode} = \frac{V_{anode} - V_{Pt(60\%)/C} - V_{ionomer}}{V_{anode}} \times 100\% = \frac{3.85 - 1.26 - 0.89}{3.85} \times 100\% = 44.16\%$$

For the cathode, the density of silver is  $10.49 \text{ g cm}^{-3}$ . If the loading of Ag NWs in the cathode is  $1.05 \text{ mg cm}^{-2}$ , hence the volume occupied by Ag NWs,  $V_{Ag}$  is

$$V_{Ag} = \frac{\text{Active Area} \times \text{Ag loading}}{\rho_{Ag}} = \frac{5 \times 1.05 \times 10^{-3}}{10.49} = 1.26 \times 10^{-3} \text{ cm}^3$$

Also, the volume occupied by ionomer,  $V_{ionomer}$  is

$$22 \quad V_{ionomer} = \frac{Active\ Area \times \frac{ionomer}{Ag} \times Ag\ loading}{\rho_{ionomer}} = \frac{5 \times \frac{20}{80} \times 1.05 \times 10^{-3}}{0.94} = 1.40 \times 10^{-3} \text{ cm}^3$$

23 The volume of the cathode,  $V_{cathode}$  is

$$24 \quad V_{cathode} = Active\ Area \times Thickness = 5 \times 4.2 \times 10^{-4} = 2.10 \times 10^{-3} \text{ cm}^3$$

25 Therefore, the porosity of **cathode** is

$$26 \quad \varepsilon_{cathode} = \frac{V_{cathode} - V_{Ag} - V_{ionomer}}{V_{cathode}} \times 100\% = \frac{2.10 - 0.50 - 1.40}{2.10} \times 100\% = 9.52\%$$

27

28

## 2. Supplementary Figures

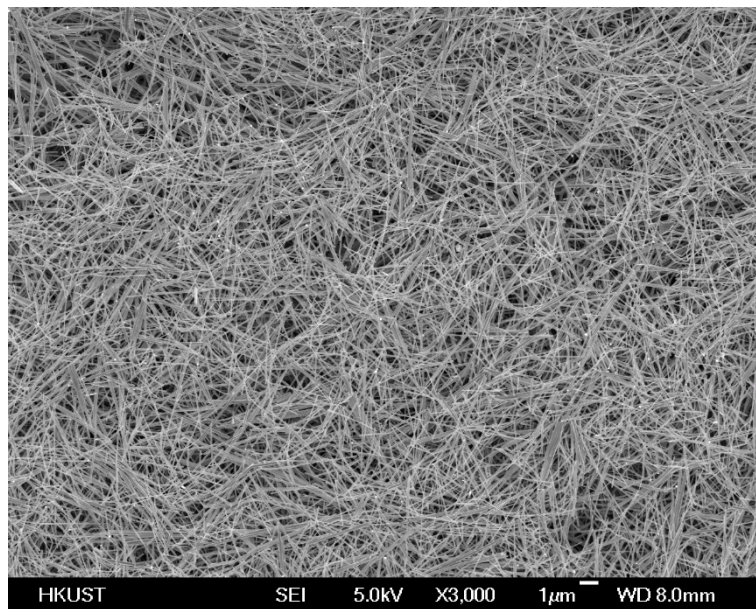

**Figure S1.** Low-resolution SEM image of as-prepared Ag NWs.

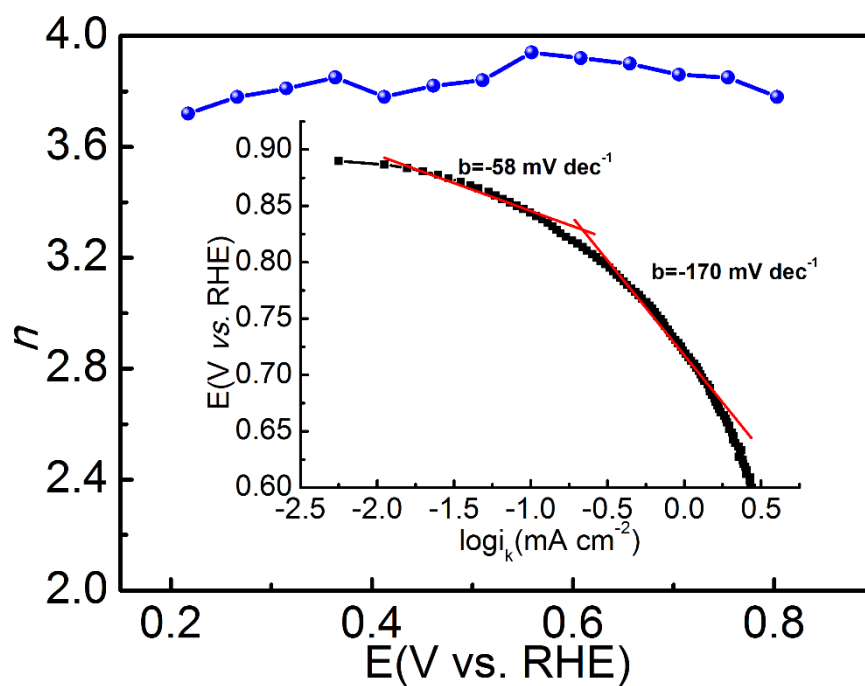

**Figure S2.** The dependence of electron transfer number on the potential for Ag NWs. The inset shows Tafel plot for Ag NWs.

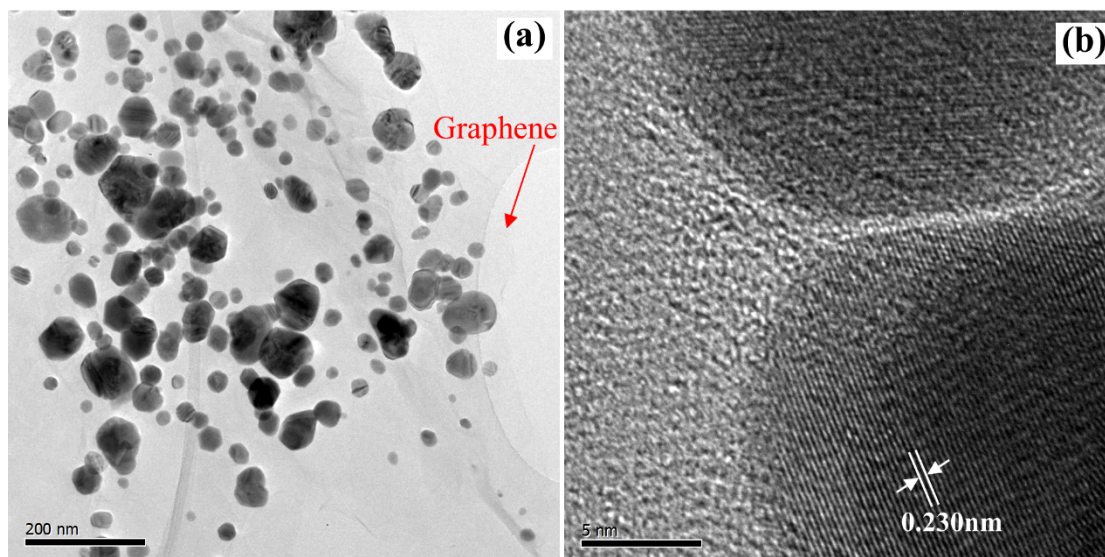

**Figure S3.** (a) A typical low-resolution TEM image of home-made Ag nanoparticles (NPs) supported on graphene nanosheets (Ag/GNS); (b) high-resolution TEM image of Ag NPs. The interfringe distance was measured to be  $0.230\text{ nm}$ , which could be indexed to the (111) plane of the *fcc*-structured Ag.

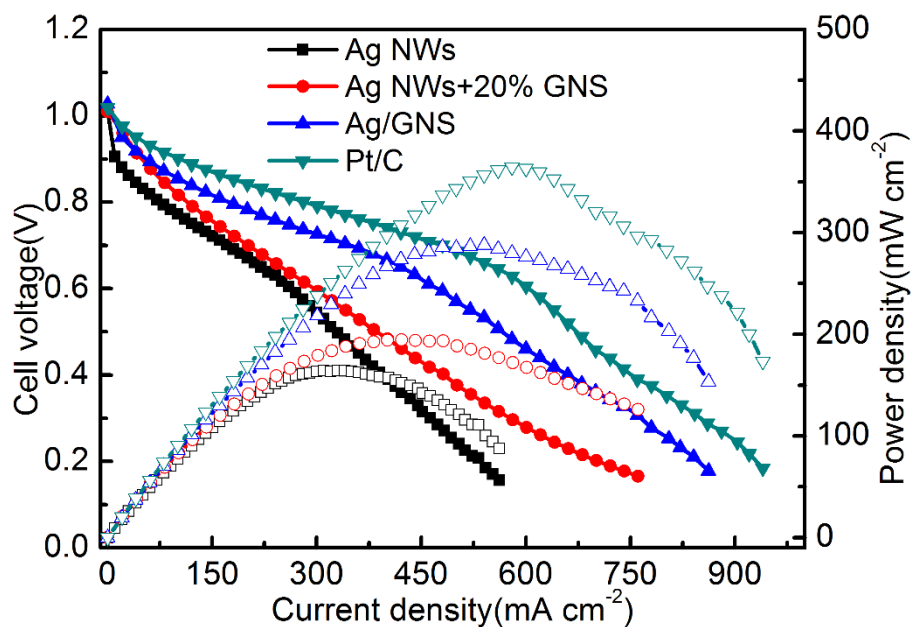

**Figure S4.** Polarization curves (filled symbols) and power density curves (empty symbols) of  $\text{H}_2/\text{O}_2$  AEMFCs with Ag NWs, Ag NWs physically mixed with 20 wt.% GNS, Ag/GNS and commercial Pt/C as the cathode catalyst. The Ag loading in the Ag-based catalyst was  $1.05 \text{ mg}_{\text{Ag}} \text{ cm}^{-2}$  while the Pt loading in commercial Pt/C catalyst was  $0.5 \text{ mg}_{\text{Pt}} \text{ cm}^{-2}$ . The ionomer loading in all the samples was controlled at 20 wt.%. Other operating parameters were stated in the experimental section.

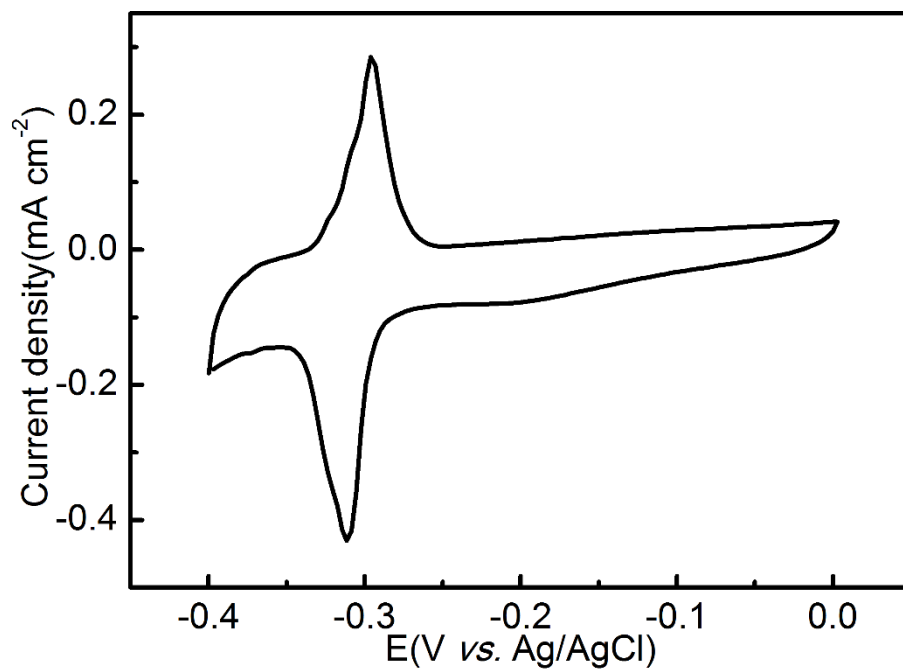

**Figure S5.** CV curves of Pb UPD in Ag/GNS. The electrochemical surface area (ECSA) was  $10.65 \text{ m}^2 \text{ g}^{-1}$  through analyzing the charge associated with Pb underpotential deposition (UPD) on Ag nanoparticles.



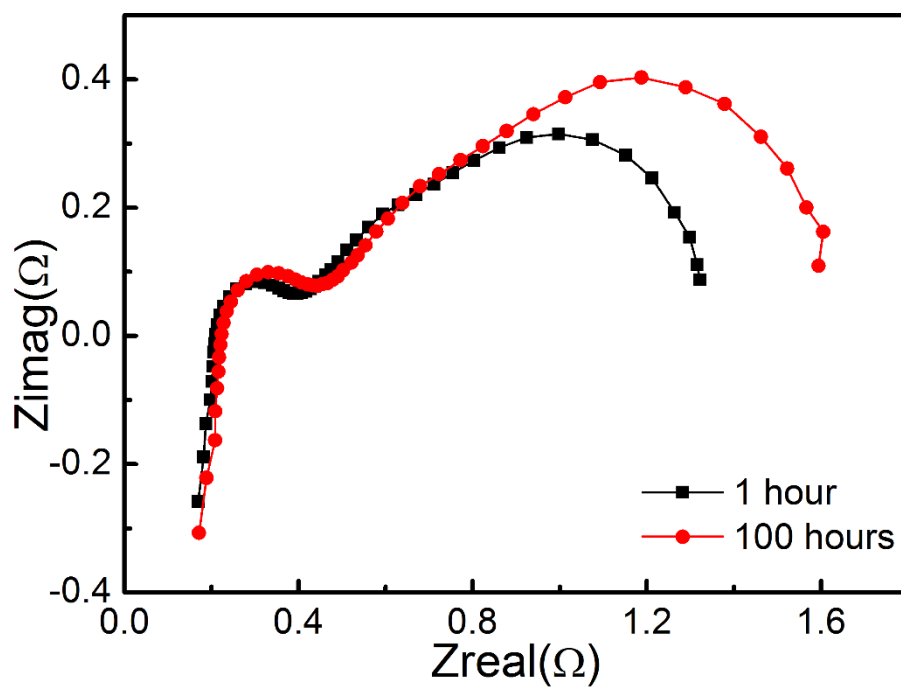

**Figure S6.** AC impedance spectra of AEMFCs before and after constant current discharge (Frequency: 100 kHz-0.1 Hz; temperature: 60°C; Anode: hydrated hydrogen gas, 500 sccm; cathode: hydrated oxygen gas, 500 sccm).
